# Supplementary material for: Magnetic nature and hyperfine interactions of transition metal atoms adsorbed on ultrathin insulating films: a challenge for DFT
Source: Royal Society of Chemistry journal article supplement (doi:10.1039/d2cp01224c), 2022-01-01
Supplement: d2cp01224c1.pdf [file d2cp01224c1.pdf]

## Magnetic nature and hyperfine interactions of transition metal atoms adsorbed on ultrathin insulating films: a challenge for DFT.

Sergio Tosoni and Gianfranco Pacchioni

### SUPPORTING INFORMATION

**Table S1.** Lattice parameters of MgO and Ag, strain released on the MgO film, Ag(100) work function, change in the work function in (MgO)<sub>ML</sub>/Ag and (MgO)<sub>BL</sub>/Ag, with respect to Ag(100), interlayer distance in (MgO)<sub>ML</sub>/Ag and (MgO)<sub>BL</sub>/Ag.

|                       | a (MgO)<br>(Å) | a (Ag)<br>(Å) | Strain<br>% | $\phi$ (Ag)<br>(eV) | $\Delta\phi$ (ML)<br>(eV)  | $\Delta\phi$ (BL)<br>(eV) | R <sub>i</sub> (ML)<br>(Å) | R <sub>i</sub> (BL)<br>(Å) |
|-----------------------|----------------|---------------|-------------|---------------------|----------------------------|---------------------------|----------------------------|----------------------------|
| PBE+D2' <sup>1</sup>  | 4.253          | 4.162         | -2.2        | 4.24                | -0.95                      | -1.33                     | 2.51                       | 2.57                       |
| PBE+D3                | 4.204          | 4.065         | -3.3        | 4.16                | -0.98                      | -1.38                     | 2.55                       | 2.57                       |
| HSE06+D3 <sup>a</sup> | --             | --            | --          | 3.83                | -1.15                      | -1.27                     | --                         | --                         |
| HSE06+D3 <sup>b</sup> | 4.154          | 4.053         | -2.2        | 3.89                |                            |                           |                            |                            |
| Exp                   | 4.211          | 4.079         | -3.1        | 4.22                | -0.5/<br>-1.2 <sup>c</sup> |                           |                            |                            |

<sup>a</sup> Single point with HSE06 at the PBE+D3 geometry

<sup>b</sup> Full relaxation with HSE06+D3

<sup>c</sup> Values in the range -0.5 eV/-1.2 eV are reported depending on the adopted technique (contact potential measurement vs. field emission resonance)<sup>2</sup>

### References

- 1 J. Pal, M. Smerieri, E. Celasco, L. Savio, L. Vattuone, R. Ferrando, S. Tosoni, L. Giordano, G. Pacchioni and M. Rocca, How Growing Conditions and Interfacial Oxygen Affect the Final Morphology of MgO/Ag(100) Films, *J. Phys. Chem. C*, 2014, **118**, 26091–26102.
- 2 T. König, G. H. Simon, H. P. Rust and M. Heyde, Work function measurements of thin oxide films on metals - MgO on Ag(001), *J. Phys. Chem. C*, 2009, **113**, 11301–11305.
